# Supplementary material for: Development and psychometric analysis of an inventory of fundamental concepts for understanding organic reaction mechanisms
Source: publisher site journal article supplement (doi:10.1515/cti-2021-0009), 2021-06-10
Supplement: Supplementary file 1 [file j_cti-2021-0009_suppl.docx]

Supplementary Information

Inventory Development: Open-Ended Questions

1. How many electrons are in -3? Explain your answer.
2. Fill in the orbitals with electrons to give the ground state configuration of . Explain your reasoning.

1s 2s 2p 3s 3p


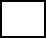

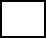

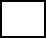

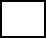

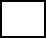

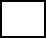

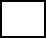

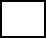


1. How many valence electrons does have? Why?
2. Complete the following Lewis structure by assigning the correct formal charges. Explain your reasoning.

1. Are there any mistakes in the following Lewis structure? If yes, then identify them and explain.

1. What is the hybridization of the indicated atom in the following molecule? Why?

1. Describe the orbital overlap between N and O in the following molecule’s π bond.

1. Which is more stable? Why?

1. Which is the shortest bond in the following molecule? Why?

1. How many σ and π bonds does the above molecule have?
2. Which atom in the following molecule is most electrophilic and why?

1. Is BCl3 a polar or non-polar molecule? Explain.
2. Pick the area of most and least electron density in the following molecule. Explain your choice.

1. Which is more acidic and why?

1. Choose the Lewis base in the following reaction. Explain your choice.

1. Draw curved arrows to show the formation of the products in the above reaction. Explain your answer.
2. Which is the electrophile and the nucleophile in the following reaction? Explain your choice.

1. Draw one valid resonance structure for the following molecule and explain why your drawing represents a valid resonance structure.

1. Trifluoroacetic acid is more acidic than acetic acid. Why?

1. Why is the following ion stable? Explain.

1. Which is more stable and why?

1. Which is a better resonance structure? Why?

1. Identify the stereocenters in the following molecule. Explain your choice.

1. The following molecule is achiral. Explain why the molecule is achiral.

1. Which is the most basic? Explain why you selected the molecule you did.

1. Which orbital do the highest energy electrons in a ground state sulfur atom occupy? Explain.
2. Give an acceptable Lewis structure for methyl azide (CH3N3). Explain.
3. How many sp hybridized atoms are in the following structure? Explain.

1. Which has the smallest bond angle? Why?

1. Which has the largest bond angle? Why?

1. What is the geometry around the indicated atom? Explain.

1. Which is the longest bond in the following molecule? Explain.

1. How many sigma bonds does the above molecule possess?
2. How many pi bonds does the above molecule possess?
3. Which is the most acidic? Explain.

1. Identify the electrophile and nucleophile in the following reaction and give a suitable curved arrow mechanism to show the formation of the product.

1. Which of the following is the major contributor to the overall resonance hybrid? Explain.

1. Which is more stable and why?

1. Which is more stable? Why?

Demographic Questions

Gender:

Major: Chemistry major Chemistry non-major

Year of study: Freshman Sophomore Junior Senior

Test Administration: Pilot Version

50 Items

(*) indicates the correct answer

Please answer the following multiple-choice and demographic questions on the scantron.

1. Which orbital do the highest energy electrons in a ground state sulfur atom occupy?
2. 2p (15.6%)
3. 3s (2.8%)
4. 3p (76.1%) (*)
5. 4p (5.5%)
6. Which is the correct representation for the ground state configuration of ?
7. (11.0%)
8. (67.0%) (*)
9. (12.8%)
10. (8.3%)
11. (0.9%)
12. What is the reason for your answer to question 2?
13. Lower energy orbitals are filled first with one electron before pairing (90.8%) (*)
14. All the empty orbitals have to be filled with electrons (3.7%)
15. The mass number gives the total number of electrons present (4.6%)
16. The electrons in the orbitals have to always be paired (0.9%)
17. How many valence electrons does have?
18. 10 valence electrons (9.2%)
19. 8 valence electrons (12.8%)
20. 6 valence electrons (67.9%) (*)
21. 4 valence electrons (4.6%)
22. 2 valence electrons (5.5%)
23. What is the reason for your answer to question 4?
24. The mass number minus the atomic number is the number of valence electrons (9.2%)
25. The valence electrons are the number of electrons in the outermost shell (46.8%) (*)
26. Oxygen is in the 6th row of the Periodic Table (38.5%)
27. There are two unpaired electrons in the outermost shell (6.4%)
28. Which of the following is the correct representation of formal charges for the following Lewis structure?

1. (73.4%) (*)
2. (9.2%)
3. (4.6%)
4. (3.7%)
5. (9.2%)
6. What is the reason for your answer to question 6?
7. Oxygen atoms without a double bond have negative charge (20.2%)
8. Oxygen atoms have an extra electron pair and nitrogen atom does not have an electron pair (62.4%) (*)
9. Oxygen atoms need a charge to eliminate strain (3.7%)
10. Oxygen and nitrogen atoms need charges to increase the stability (14.7%)
11. Which of the following best describes what is wrong with the given Lewis structure for a compound with the molecular formula C2H6NO? (All formal charges have been omitted for clarity)

1. Oxygen atoms should not have an unpaired electron (38.5%)
2. Oxygen atoms should not have any lone pairs (6.4%)
3. There are too many electrons around oxygen atom (1.8%)
4. There are too many electrons around nitrogen atom (53.2%) (*)
5. Which one of the following is an acceptable Lewis structure for methyl azide (CH3N3).
6. (4.6%)
7. (16.5%)
8. (11.9%)
9. (67.0%) (*)
10. What is the reason for your answer to question 9?
11. Methyl group is connected to a single nitrogen atom and forms a chain (3.7%)
12. Each atom in the structure fully satisfies the octet rule (24.8%)
13. Each atom has a complete octet and formal charges are assigned correctly (64.2%) (*)
14. Nitrogen atoms always form three bonds and carbon atoms form four bonds (8.3%)
15. What is the hybridization of the labelled atom in the following molecule?

1. sp (21.1%)
2. sp2 (62.4%) (*)
3. sp3 (14.7%)
4. sp3d (1.8%)
5. What is the reason for your answer to question 11?
6. The oxygen atom is not attached to any hydrogen atoms (0.9%)
7. The oxygen atom has only one connection to a carbon atom (15.6%)
8. The oxygen atom has a double bond (44.0%)
9. The oxygen atom has three electron groups around it (40.4%) (*)
10. Which of the following best describes the orbital overlap between N and O in the following molecule’s π bond?

1. p-p overlap (16.5%) (*)
2. sp-sp2 overlap (31.2%)
3. sp2-sp2 overlap (45.9%)
4. sp-sp overlap (6.4%)
5. Lone pairs on oxygen atom overlap with lone pairs on nitrogen atom (0.0%)
6. What is the reason for your answer to question 13?
7. The lone pairs can move around and occupy space (6.4%)
8. Side to side overlap of p orbitals makes π bonds (39.4%) (*)
9. The presence of two lone pairs and a double bond creates a π bond (18.3%)
10. Both atoms are sp2 hybridized (36.7%)
11. How many sp2 hybridized atoms are in the following structure?

1. 0 (4.6%)
2. 1 (7.3%)
3. 2 (67.9%) (*)
4. 3 (2.1%)
5. What is the reason for your answer to question 15?
6. No triple bond present (3.7%)
7. Three electron groups attached (55.0%) (*)
8. Sigma and pi bonds (42.2%)
9. Only attached to hydrogen atoms (0.0%)
10. Which molecule has the smallest bond angle?

1. 1 (19.3%) (*)
2. 2 (12.8%)
3. 3 (67.9%)
4. What is the reason for your answer to question 17?
5. The lone pairs repel each other (35.8%) (*)
6. The lone pairs pull the fluorine atoms away (14.7%)
7. There are no lone pairs present (50.5%)
8. Which molecule has the largest bond angle?

1. 1 (54.1%)
2. 2 (7.3%)
3. 3 (39.4%) (*)
4. What is the reason for your answer to question 19?
5. It has the least number of atoms (16.5%)
6. The hydrogen atom occupies less space (35.8%)
7. The methyl groups are bulky (47.7%) (*)
8. Which statement best describes the geometry of the indicated atom?

1. Trigonal planar (52.3%) (*)
2. Trigonal pyramidal (18.3%)
3. Bent (12.8%)
4. Linear (2.8%)
5. Tetrahedral (13.8%)
6. Which is the longest bond in the following molecule?

1. a (34.0%)
2. b (6.4%)
3. c (33.0%) (*)
4. d (27.5%)
5. What is the reason for your answer to question 22?
6. Presence of the triple bond (31.2%)
7. Greatest amount of s character (30.3%)
8. The rest are carbon atoms (14.7%)
9. Least amount of s character (24.8%) (*)
10. How many sigma bonds does the molecule in question 22 possess?
11. 6 (6.4%)
12. 7 (59.6%)
13. 10 (17.4%)
14. 15 (9.2%)
15. 16 (8.3%) (*)
16. How many pi bonds does the molecule in question 22 possess?
17. 1 (4.6%)
18. 2 (27.5%)
19. 3 (67.9%) (*)
20. 4 (0.9%)
21. Which atom in the following molecule is most electrophilic?

1. Oxygen atom (11.0%)
2. Fluorine atom (67.9%)
3. Hydrogen atom (4.6%)
4. Carbon atom that is part of the C=O group (6.4%) (*)
5. Carbon atom that is part of the CH3 group (10.1%)
6. What is the reason for your answer to question 26?
7. Attached to two electron withdrawing groups (13.8%) (*)
8. Has lone pair of electrons to donate (24.8%)
9. It has less electronegativity (19.3%)
10. It is to the right in the Periodic Table (43.1%)
11. Which of the following best describes the BCl3 molecule?
12. Polar (38.5%)
13. Non-polar (58.7%) (*)
14. Apolar (2.8%)
15. What is the reason for your answer to question 28?
16. All atoms have equal formal charge (12.8%)
17. Chlorine atoms pull electrons towards themselves (45.0%)
18. Electronegativity difference is too small (10.1%)
19. The molecule is symmetrical (32.1%) (*)
20. Which are the areas of greatest and least electron density in the following molecule?

1. Greatest electron density is centered on the oxygen atom and the least is centered on the hydrogen atom attached to the oxygen atom (50.5%) (*)
2. Greatest electron density is centered on the oxygen atom and the least is centered on the internal double bond (15.6%)
3. Greatest electron density is centered on the internal double bond and the least is centered on the terminal double bond (14.7%)
4. Greatest electron density is centered on the oxygen atom and least is centered on the terminal double bond (19.3%)
5. What is the reason for your answer to question 30?
6. No lone pairs are present (11.9%)
7. Double bonds are harder to break (30.3%)
8. The least electronegative atom has the least electron density (52.3%) (*)
9. Too many bonds present (5.5%)
10. Which is the most acidic?

1. 1 (11.9%)
2. 2 (46.8%) (*)
3. 3 (17.4%)
4. 4 (23.9%)
5. What is the reason for your answer to question 32?
6. Possibility for hydrogen bonding (28.4%)
7. Most number of protons available to donate (16.5%)
8. Conjugate base stabilized by resonance (40.4%) (*)
9. Most electronegative atoms present (14.8%)
10. Which is more acidic?

1. 1 (40.4%) (*)
2. 2 (59.6%)
3. What is the reason for your answer to question 34?
4. Sulfur is more polarizable (24.8%) (*)
5. The O-H bond is stronger than the S-H bond (26.6%)
6. The product is more stable with a positive charge (9.2%)
7. Oxygen atoms are more electronegative (32.1%)
8. It is able to hold the charge better (7.3%)
9. Which molecule is the Lewis base for the forward reaction?

1. Acetic acid (17.4%)
2. Water (69.7%) (*)
3. Hydronium ion (5.5%)
4. Acetate ion (7.3%)
5. What is the reason for your answer to question 36?
6. It donates the hydrogen atom (2.3%)
7. It is a proton acceptor (52.3%) (*)
8. It is an electron-pair donor (14.7%)
9. It becomes a conjugate acid (10.1%)
10. Which of the following best depicts the curved arrows to show the formation of the products in the above reaction? (All lone pairs have been omitted for clarity)
11. (21.1%)
12. (19.3%)
13. (11.0%)
14. (42.2%) (*)
15. (6.4%)
16. What is the reason for your answer to question 38?
17. Lone pair on water forms a bond to a proton and the electrons go to the oxygen atom (38.5%) (*)
18. The water molecule pulls the proton off of the acetic acid molecule (33.0%)
19. Electrons flow from the hydrogen atom to make the bond (22.0%)
20. Oxygen atom of acetic acid is most susceptible to protonation from a water molecule (6.4%)
21. Which is the electrophile and which is the nucleophile in the following reaction?

1. Electrophile-ethyl bromide, Nucleophile-sodium cyanide (38.5%) (*)
2. Electrophile-sodium cyanide, Nucleophile-ethyl bromide (31.2%)
3. Electrophile-ethyl bromide, Nucleophile-sodium bromide (18.3%)
4. Electrophile-sodium cyanide, Nucleophile-ethyl cyanide (11.9%)
5. Which one of the following gives the correct curved arrow notation for the formation of the product and correctly identifies the electrophile and the nucleophile?

1. Nucelophile-1, Electrophile-2 (20.2%)
2. Nucleophile-OH-, Electrophile-1 (43.1%)
3. Nucleophile-OH-, Electrophile-1 (32.1%) (*)
4. Nucleophile-1, Electrophile-OH- (4.6%)
5. Which of the following is the major contributor to the overall resonance hybrid?

1. 1 (23.9%) (*)
2. 2 (36.7%)
3. 3 (24.8%)
4. 4 (14.7%)
5. What is the reason for your answer to question 42?
6. It has the most number of bonds (22.9%) (*)
7. It shows the movement of electrons (34.9%)
8. The charges are next to each other (18.3%)
9. The charges are alternating (23.9%)
10. Trifluoroacetic acid is more acidic than acetic acid. Why?

1. Because trifluoroacetic acid is tertiary (6.4%)
2. Because fluorine is more acidic than OH (24.8%)
3. It has more hydrogen bonding capability (9.2%)
4. Additional resonance from the three fluorine atoms (18.3%)
5. The inductive effect of the fluorine atoms stabilizes the anion (41.3%) (*)
6. Why is the following ion stable?

1. Resonance (61.5%) (*)
2. Induction (24.8%)
3. Position of the electrons (6.4%)
4. Hydride shift (1.8%)
5. Stable electron density (5.5%)
6. Which is most stable?

1. 1 (50.5%) (*)
2. 2 (27.5%)
3. 3 (7.3%)
4. 4 (14.7%)
5. What is the reason for your answer to question 46?
6. Induction (45.0%) (*)
7. Charge is centralized (30.3%)
8. It is the most symmetrical (10.1%)
9. Positive charge is at the end (14.7%)
10. Why is the following molecule an acceptable resonance structure of formaldehyde?

1. Electrons can go to the carbon atom (19.3%)
2. The oxygen atom wants to donate electrons (17.4%)
3. The oxygen atom can leave easier as a leaving group (11.9%)
4. The oxygen atom is more electronegative than carbon atoms (51.4%) (*)
5. Which is more stable?

1. 1 (56.9%) (*)
2. 2 (43.1%)
3. What is the reason for your answer to question 49?
4. The fluorine atom can delocalize the electrons (22.0%) (*)
5. The ion can attract positively charged compounds (15.6%)
6. The fluorine atom is electronegative (50.5%)
7. Cations are more stable than anions (11.9%)

Demographic Questions

1. Gender
2. Male
3. Female
4. Other
5. Major
6. Chemistry
7. Biology
8. SES
9. Dietetics
10. Other
11. Year of study
12. Freshman
13. Sophomore
14. Junior
15. Senior
16. Other
17. High school graduation year
18. 2017 or 2018
19. Other
20. Organic Chemistry course information
21. I am taking this course for the first time
22. I am repeating this course

Test Administration: Beta Version

27 Items

(*) indicates the correct answer

Please answer the following multiple-choice and demographic questions on the bubble sheet.

1. How many valence electrons does have?
2. 10 valence electrons (3.9%)
3. 8 valence electrons (20.3%)
4. 6 valence electrons (71.6%) (*)
5. 2 valence electrons (4.2%)
6. What is the reason for your answer to question 1?
7. The mass number minus the atomic number is the number of valence electrons. (4.2%)
8. The valence electrons are equal to the number of protons. (12.5%)
9. Oxygen is in group 6A of the periodic table. (63.5%) (*)
10. The number of unpaired electrons in the outermost shell. (18.9%)
11. Which one of the following is an acceptable Lewis structure for methyl azide (CH3N3)?
12. (21.4%)
13. (11.4%)
14. (66.6%) (*)
15. What is the reason for your answer to question 3?
16. The nitrogen atoms furthest away from a carbon atom have a positive charge. (10.0%)
17. Each atom has a complete octet and formal charges are assigned correctly. (79.4%) (*)
18. Nitrogen atoms always form three bonds and carbon atoms form four bonds. (10.6%)
19. What is the hybridization of the labelled atom in the following molecule?

1. sp (17.3%)
2. sp2 (76.6%) (*)
3. sp3 (6.1%)
4. What is the reason for your answer to question 5?
5. The oxygen atom has only one connection to a carbon atom. (11.4%)
6. The oxygen atom has a π bond. (47.6%)
7. The oxygen atom has three electron groups around it. (40.9%) (*)
8. Which statement best describes the geometry of the indicated atom?

1. Trigonal planar (63.5%) (*)
2. Trigonal pyramidal (11.1%)
3. Bent (18.4%)
4. Tetrahedral (6.7%)
5. Which is the strongest bond in the following molecule?

1. a (4.5%)
2. b (26.7%)
3. c (68.2%) (*)
4. What is the reason for your answer to question 8?
5. The proximity of the triple bond makes the bond the strongest. (60.7%)
6. It has the greatest percentage of s orbitals that make up the hybrids in the bond. (19.8%) (*)
7. It is the one that has the overlap of sp3 orbitals from both atoms. (19.5%)
8. Which atom in the following molecule is most electrophilic?

1. Oxygen atom (7.0%)
2. Fluorine atom (69.1%)
3. Carbon atom that is part of the C=O group (14.8%) (*)
4. Carbon atom that is part of the CH3 group (9.2%)
5. What is the reason for your answer to question 10?
6. The atom is attached to two electron withdrawing groups. (19.8%) (*)
7. The atom has a lone pair of electrons to donate. (8.9%)
8. The atom has the least electronegativity. (11.4%)
9. The atom is furthest to the right in the Periodic Table. (60.2%)
10. Which is the region of greatest electron density in the following molecule?

1. The greatest electron density is centered on the oxygen atom. (74.7%) (*)
2. The greatest electron density is centered on the hydrogen atom (2.8%)
3. The greatest electron density is centered on the internal double bond (17.8%)
4. The greatest electron density is centered on the terminal double bond (4.7%)
5. What is the reason for your answer to question 12?
6. There are no lone pairs present in that region. (4.2%)
7. The double bonds are harder to break. (12.8%)
8. The most electronegative atom has the most electron density. (71.3%) (*)
9. The other atoms are stabilized by resonance. (11.4%)
10. Which is more acidic?

1. 1 (62.4%) (*)
2. 2 (37.6%)
3. What is the reason for your answer to question 14?
4. The sulfur atom is more polarizable thereby stabilizing the conjugate base. (37.6%) (*)
5. The S-H bond is stronger than the O-H bond. (13.6%)
6. The product is more stable with a positive charge. (6.4%)
7. The oxygen atom is more electronegative than the sulfur atom. (42.3%)
8. Which molecule is the Brønsted-Lowry base for the forward reaction?

1. Acetic acid (13.1%)
2. Water (63.2%) (*)
3. Hydronium ion (13.4%)
4. Acetate ion (9.7%)
5. What is the reason for your answer to question 16?
6. The Brønsted-Lowry base donates the hydrogen atom. (17%)
7. The Brønsed-Lowry base is a proton acceptor. (66.9%) (*)
8. The Brønsted-Lowry base is an electron-pair donor. (12.8%)
9. The Brønsted-Lowry base becomes negatively charged. (3.3%)
10. Which of the following best depicts the curved arrows to show the formation of the products in the above reaction?
11. (20.9%)
12. (12.8%)
13. (8.4%)
14. (57.9%) (*)
15. What is the reason for your answer to question 18?
16. Lone pair on water forms a bond to a proton and the electrons go to the oxygen atom. (62.1%) (*)
17. The water molecule accepts the proton from the acetic acid molecule. (23.4%)
18. The electrons flow from the hydrogen atom to make the bond. (7.8%)
19. Oxygen atom of acetic acid is most susceptible to protonation from a water molecule. (6.9%)
20. Which is the electrophile and which is the nucleophile in the following reaction?

[I] [II] [III] [IV]

1. Electrophile-[I], Nucleophile-[II] (35.4%) (*)
2. Electrophile-[II], Nucleophile-[I] (35.9%)
3. Electrophile-[I], Nucleophile-[IV] (16.2%)
4. Electrophile-[II], Nucleophile-[III] (12.5%)
5. Which one of the following gives the correct curved arrow notation for the formation of the product and correctly identifies the electrophile and the nucleophile?

1. Nucelophile-1, Electrophile-2 (5.0%)
2. Nucleophile-OH-,Electrophile-1 (14.8%)
3. Nucleophile-OH-, Electrophile-1 (51.5%) (*)
4. Nucleophile-1, Electrophile-OH- (28.4%)
5. Which of the following is the major contributor to the overall resonance hybrid for prop-2-enal?

1. 1 (29.2%) (*)
2. 2 (38.4%)
3. 3 (24.0%)
4. 4 (8.4%)
5. What is the reason for your answer to question 22?
6. It has the most number of bonds. (19.2%) (*)
7. It shows the movement of electrons. (32.9%)
8. The charges are next to each other. (17.8%)
9. The charges are alternating. (30.1%)
10. Trifluoroacetic acid is more acidic than acetic acid. Why?

Trifluoroacetic Acid Acetic Acid

1. This is because fluorine is more acidic than OH. (17.3%)
2. This is because it has more hydrogen bonding capability. (9.5%)
3. There is additional resonance from the three fluorine atoms. (22.0%)
4. The inductive effect of the fluorine atoms stabilize the conjugate base. (51.0%) (*)
5. Which is most stable?

1. 1 (67.7%) (*)
2. 2 (13.1%)
3. 3 (17.0%)
4. What is the reason for your answer to question 25?
5. The alkyl groups are electron donating. (20.9%) (*)
6. The charge is on the central atom. (40.1%)
7. The carbocation is most symmetrical. (20.1%)
8. The carbocation has a positive charge at the end. (18.9%)
9. Why is the following molecule an acceptable resonance structure of formaldehyde?

1. The electrons can go to the carbon atom. (12.3%)
2. The oxygen atom is capable of donating electrons. (19.8%)
3. The oxygen atom can leave easier as a leaving group. (4.7%)
4. The oxygen atom is more electronegative than the carbon atom. (63.2%) (*)

Demographic Questions

1. Gender
2. Male
3. Female
4. Other
5. Major
6. Chemistry
7. Biology
8. SES
9. Dietetics
10. Other
11. Year of study
12. Freshman
13. Sophomore
14. Junior
15. Senior
16. Other
17. High school graduation year
18. 2017 or 2018
19. Other
20. Organic Chemistry course information
21. I am taking this course for the first time
22. I am repeating this course

Test Administration: Alpha Version

26 Items

(*) indicates the correct answer

Please answer the following multiple-choice and demographic questions on the bubble sheet.

1. Which of the following is an acceptable Lewis structure for methyl azide (CH3N3)?
2. (19.0%)

(b) (12.9%)

1. (68.1%) (*)
2. What is the reason for your answer to question 1?
3. The nitrogen atoms furthest away from a carbon atom have a positive charge. (6.6%)
4. Each atom has a complete octet and formal charges are assigned correctly. (81.8%) (*)
5. Nitrogen atoms always form three bonds and carbon atoms form four bonds. (11.6%)
6. What is the hybridization of the labelled atom in the following molecule?

1. sp (9.8%)
2. sp2 (83.9%) (*)
3. sp3 (6.2%)
4. What is the reason for your answer to question 3?
5. The oxygen atom has only one connection to a carbon atom. (11.3%)
6. The oxygen atom has two lone pairs of electrons. (21.5%)
7. The oxygen atom has three electron domains around it. (67.2%) (*)
8. Which statement best describes the geometry of the indicated atom?

1. Trigonal planar (57.6%) (*)
2. Trigonal pyramidal (16.3%)
3. Bent (18.5%)
4. Tetrahedral (7.6%)
5. Which is the strongest bond in the following molecule?

1. a (4.9%)
2. b (31.7%)
3. c (63.3%) (*)
4. What is the reason for your answer to question 6?
5. The hybridization of the atoms leads to the longest bond. (23.2%)
6. It has the greatest percentage of s orbitals that make up the hybrids in the bond. (39.4%) (*)
7. It is the one that has the overlap of sp3 orbitals from both atoms. (37.3%)
8. Which atom in the following molecule is most electrophilic?

1. Oxygen atom (19.1%)
2. Chlorine atom (42.5%)
3. Carbon atom that is part of the C=O group (26.6%) (*)
4. Carbon atom that is part of the CH3 group (11.8%)
5. What is the reason for your answer to question 8?
6. The atom is attached to two electron withdrawing groups. (26.3%) (*)
7. The atom has a lone pair of electrons to donate. (17.9%)
8. The atom has the least electronegativity. (18.5%)
9. The atom is furthest to the right in the Periodic Table. (37.3%)
10. Which is the region of greatest electron density in the following molecule?

1. The greatest electron density is centered on a. (2.8%)
2. The greatest electron density is centered on b. (81.4%) (*)
3. The greatest electron density is centered on c. (13.1%)
4. The greatest electron density is centered on d. (2.7%)
5. What is the reason for your answer to question 10?
6. There are no lone pairs present in that region. (3.7%)
7. The double bonds are harder to break. (11.7%)
8. The most electronegative atom has the most electron density. (73.2%) (*)
9. The other atoms are stabilized by resonance. (11.4%)
10. Which is more acidic?

1. 1 (62.4%) (*)
2. 2 (37.6%)
3. What is the reason for your answer to question 12?
4. The sulfur atom is more polarizable thereby stabilizing the conjugate base. (41.2%) (*)
5. The S-H bond is stronger than the O-H bond. (15.9%)
6. The product is more stable with a positive charge. (6.8%)
7. The oxygen atom is more electronegative than the sulfur atom. (36.1%)
8. Which molecule is the Brønsted-Lowry base for the forward reaction?

1. 1 (15.4%)
2. 2 (60.6%) (*)
3. 3 (13.3%)
4. 4 (10.8%)
5. What is the reason for your answer to question 14?
6. The Brønsted-Lowry base donates the hydrogen atom. (19.0%)
7. The Brønsed-Lowry base is a proton acceptor. (64.7%) (*)
8. The Brønsted-Lowry base is an electron-pair donor. (12.7%)
9. The Brønsted-Lowry base becomes negatively charged. (3.6%)
10. Which of the following best depicts the curved arrows to show the formation of the products in the reaction shown in question 14?
11. (20.5%)
12. (10.2%)
13. (5.4%)
14. (63.9%) (*)
15. What is the reason for your answer to question 16?
16. Lone pair on water forms a bond to a proton and the electrons go to the oxygen atom. (58.4%) (*)
17. The water molecule accepts the proton from the acetic acid molecule. (27.0%)
18. The electrons flow from the hydrogen atom to make the bond. (8.1%)
19. Oxygen atom of acetic acid is most susceptible to protonation from a water molecule. (6.5%)
20. Which is the electrophile in the following reaction?

1. 1 (61.1%) (*)
2. 2 (38.9%)
3. What is the reason for your answer to question 18?
4. 1 is the electrophile because it contains the most electropositive atom. (34.8%) (*)
5. 1 is the electrophile because it has the electrons which are needed to become an ion. (24.7%)
6. 2 is the electrophile because it contains the most electronegative atom. (27.1%)
7. 2 is the electrophile because it is the strongest base. (13.4%)
8. Which one of the following gives the correct curved arrow notation for the formation of the product and correctly identifies the electrophile and the nucleophile?

1. Nucelophile-1, Electrophile-2 (6.6%)
2. Nucleophile-OH-, Electrophile-1 (17.9%)
3. Nucleophile-OH-, Electrophile-1 (50.7%) (*)
4. Nucleophile-1, Electrophile-OH- (24.7%)
5. Which of the following is the major contributor to the overall resonance hybrid?

1. 1 (41.0%) (*)
2. 2 (23.4%)
3. 3 (23.6%)
4. 4 (12.0%)
5. What is the reason for your answer to question 21?
6. It has the most number of bonds. (32.0%)
7. It shows the movement of electrons. (33.2%)
8. The charges are next to each other. (13.8%)
9. The charges are alternating. (21.0%)
10. Trifluoroacetic acid is more acidic than acetic acid. Why?

Trifluoroacetic Acid Acetic Acid

1. This is because fluorine is more acidic than OH. (21.1%)
2. This is because it has more hydrogen bonding capability. (8.2%)
3. There is additional resonance from the three fluorine atoms. (16.3%)
4. The inductive effect of the fluorine atoms stabilize the conjugate base. (54.3%) (*)
5. Which of the following is the most stable?

1. 1 (54.4%) (*)
2. 2 (18.7%)
3. 3 (26.8%)
4. What is the reason for your answer to question 24?
5. The alkyl groups are electron donating. (27.0%) (*)
6. The carbocation is most symmetrical. (32.4%)
7. The carbocation can easily grab electrons. (40.6%)
8. Why is the following molecule an acceptable resonance structure of formaldehyde?

1. The electrons can go to the carbon atom. (10.0%)
2. The oxygen atom is capable of donating electrons. (27.2%)
3. The oxygen atom can leave easier as a leaving group. (8.1%)
4. The oxygen atom is more electronegative than the carbon atom. (55.1%) (*)

Demographic Questions

1. Gender
2. Male
3. Female
4. Other
5. Major
6. Chemistry/Biochemistry
7. Biology/Pre-health
8. Sports and Exercise Science
9. Dietetics
10. Other
11. Year of study
12. Freshman
13. Sophomore
14. Junior
15. Senior
16. Other
17. High school graduation year
18. 2016
19. 2017
20. 2018
21. 2019
22. Before 2016
23. Organic Chemistry course information
24. I am taking this course for the first time
25. I am repeating this course

Psychometric Analysis: Difficulty and Discrimination of Pilot Items

| Item | Difficulty (*P*) | Discrimination (*D*) |
| --- | --- | --- |
| 1 | 0.75 | -0.06 |
| 2 | 0.7 | 0.09 |
| 3 | 0.9 | 0.06 |
| 4 | 0.68 | 0.02 |
| 5 | 0.46 | 0.19 |
| 6 | 0.72 | 0.23 |
| 7 | 0.62 | 0.28 |
| 8 | 0.52 | 0.13 |
| 9 | 0.66 | 0.32 |
| 10 | 0.6 | 0.09 |
| 11 | 0.64 | 0.25 |
| 12 | 0.41 | 0.21 |
| 13 | 0.16 | 0.13 |
| 14 | 0.38 | 0.08 |
| 15 | 0.67 | 0.04 |
| 16 | 0.51 | 0.23 |
| 17 | 0.21 | 0.26 |
| 18 | 0.37 | 0.25 |
| 19 | 0.42 | 0.34 |
| 20 | 0.45 | 0.32 |
| 21 | 0.54 | 0.4 |
| 22 | 0.35 | 0.17 |
| 23 | 0.26 | -0.02 |
| 24 | 0.09 | 0.17 |
| 25 | 0.63 | 0.26 |
| 26 | 0.08 | 0.08 |
| 27 | 0.14 | 0.09 |
| 28 | 0.59 | 0.26 |
| 29 | 0.35 | 0.47 |
| 30 | 0.51 | 0.19 |
| 31 | 0.51 | 0.15 |
| 32 | 0.47 | 0.02 |
| 33 | 0.37 | 0.17 |
| 34 | 0.39 | 0.25 |
| 35 | 0.25 | 0.15 |
| 36 | 0.69 | 0.23 |
| 37 | 0.14 | 0.06 |
| 38 | 0.41 | 0.17 |
| 39 | 0.38 | 0.15 |
| 40 | 0.34 | 0.15 |
| 41 | 0.36 | 0.11 |
| 42 | 0.26 | 0.25 |
| 43 | 0.26 | 0.32 |
| 44 | 0.34 | 0.34 |
| 45 | 0.57 | 0.08 |
| 46 | 0.42 | 0.38 |
| 47 | 0.38 | 0.23 |
| 48 | 0.45 | 0.09 |
| 49 | 0.5 | 0.08 |
| 50 | 0.27 | 0.08 |

Psychometric Analysis: Difficulty and Discrimination of Beta Items

| Item | Difficulty (*P*) | Discrimination (*D*) |
| --- | --- | --- |
| 1 | 0.71 | 0.16 |
| 2 | 0.6 | 0.13 |
| 3 | 0.63 | 0.53 |
| 4 | 0.77 | 0.28 |
| 5 | 0.78 | 0.1 |
| 6 | 0.46 | 0.35 |
| 7 | 0.65 | 0.49 |
| 8 | 0.68 | -0.05 |
| 9 | 0.19 | 0.1 |
| 10 | 0.19 | 0.21 |
| 11 | 0.22 | 0.28 |
| 12 | 0.7 | 0.38 |
| 13 | 0.67 | 0.35 |
| 14 | 0.65 | 0.45 |
| 15 | 0.41 | 0.39 |
| 16 | 0.6 | 0.47 |
| 17 | 0.61 | 0.4 |
| 18 | 0.57 | 0.54 |
| 19 | 0.62 | 0.62 |
| 20 | 0.34 | 0.35 |
| 21 | 0.5 | 0.44 |
| 22 | 0.32 | 0.29 |
| 23 | 0.2 | 0.25 |
| 24 | 0.49 | 0.59 |
| 25 | 0.7 | 0.43 |
| 26 | 0.26 | 0.24 |
| 27 | 0.62 | 0.56 |

Psychometric Analysis: Difficulty and Discrimination of Alpha Items

| Item | Difficulty (P) | Discrimination (D) |
| --- | --- | --- |
| 1 | 0.67 | 0.39 |
| 2 | 0.82 | 0.28 |
| 3 | 0.84 | 0.26 |
| 4 | 0.67 | 0.47 |
| 5 | 0.59 | 0.49 |
| 6 | 0.64 | 0.13 |
| 7 | 0.41 | 0.38 |
| 8 | 0.31 | 0.38 |
| 9 | 0.29 | 0.37 |
| 10 | 0.79 | 0.31 |
| 11 | 0.69 | 0.41 |
| 12 | 0.63 | 0.28 |
| 13 | 0.43 | 0.39 |
| 14 | 0.63 | 0.51 |
| 15 | 0.64 | 0.39 |
| 16 | 0.64 | 0.53 |
| 17 | 0.59 | 0.48 |
| 18 | 0.60 | 0.50 |
| 19 | 0.37 | 0.38 |
| 20 | 0.51 | 0.34 |
| 21 | 0.45 | 0.53 |
| 22 | 0.36 | 0.43 |
| 23 | 0.53 | 0.61 |
| 24 | 0.55 | 0.42 |
| 25 | 0.32 | 0.23 |
| 26 | 0.56 | 0.48 |

Memorandum to the Instructors for the Administration of the Inventory

The Fundamental Concepts for Organic Reaction Mechanisms Inventory (FC-ORMI) can be used as a summative assessment to determine students alternate conceptions on concepts that are pertinent to developing proficiency in organic reaction mechanisms. Here are specific instructions needed for administration of the FC-ORMI.

Number of Questions: 26

Time Duration for Test: 25 minutes

Student Population: First-semester undergraduate organic chemistry students

Testing:

- The test is best administered in week 7 of the semester – results indicate how the students performed after any review of general chemistry material that they should have been exposed to and organic chemistry material that is covered during the first few weeks of the class
- The test is administered in the regular class period
- No instructional materials (class notes, textbook, etc.) are allowed
- A Periodic Table can be provided to the students

Concepts Covered:

Majority of the questions are in linked pairs which is indicated below where students have to first choose their answer and then provide a reason for their choice which gives more information on their thought process while answering the questions.

| Concept | Question Numbers | Knowledge Statements (from correct responses) |
| --- | --- | --- |
| Lewis structures | 1/2 | -drawing Lewis structures while satisfying octet rule and assigning correct formal charges |
|
| Hybridization | 3/4 | -identifying state of hybridization based on electron domains around an atom |
| Molecular geometry | 5* | -identifying molecular geometry at specific centers |
| Bonding | 6/7 | -determining bond strength based on percentage s character |
| Electron density & polarity | 8/9  10/11 | -identifying electrophilic centers based on polarity  -identifying regions of electron density based on electronegativity |
| Acids & bases | 12/13  14/15  16/17 | -identifying acids based on stability of conjugate bases  -determining Brønsted-Lowry bases for a given reaction  -recognizing electron-flow for proton-transfer reactions |
| Electrophiles & nucleophiles | 18/19  20* | -choosing electrophiles and nucleophiles for specific reactions |
| Resonance & inductive effects | 21/22  23*  26* | -selecting possible resonance structures and the resonance contributors that contribute most to the resonance hybrid  -effect of induction on acidity |
| Stability of intermediates | 24/25 | -factors affecting stability of carbocations |

*Single questions that are not linked pairs

Results: Instructors should examine the results of the test based on the aggregate score, by determining specific questions where students underperform. For example, if the students do not obtain a satisfactory score on questions 18/19, the instructor may wish to provide additional information/instruction on the concept of electrophiles & nucleophiles before introducing the topic of reaction mechanisms to the students.
